# Supplementary material for: Copillar[5]arene-rhodamine conjugate as a selective sensor for Hg2+ ions
Source: Royal Society of Chemistry journal article supplement (doi:10.1039/c9nj06264e), 2020-01-01
Supplement: c9nj06264e1.pdf [file c9nj06264e1.pdf]

## Copillar[5]arene-rhodamine conjugate as a selective sensor for Hg<sup>2+</sup> ions

Saswati Ghosh Roy, Subhendu Mondal and Kumaresh Ghosh\*

Department of Chemistry, University of Kalyani, Kalyani-741235, Nadia, West Bengal, India.

\* Corresponding author: E-mail: [ghosh\\_k2003@yahoo.co.in](mailto:ghosh_k2003@yahoo.co.in); [kumareshchem18@klyuniv.ac.in](mailto:kumareshchem18@klyuniv.ac.in)

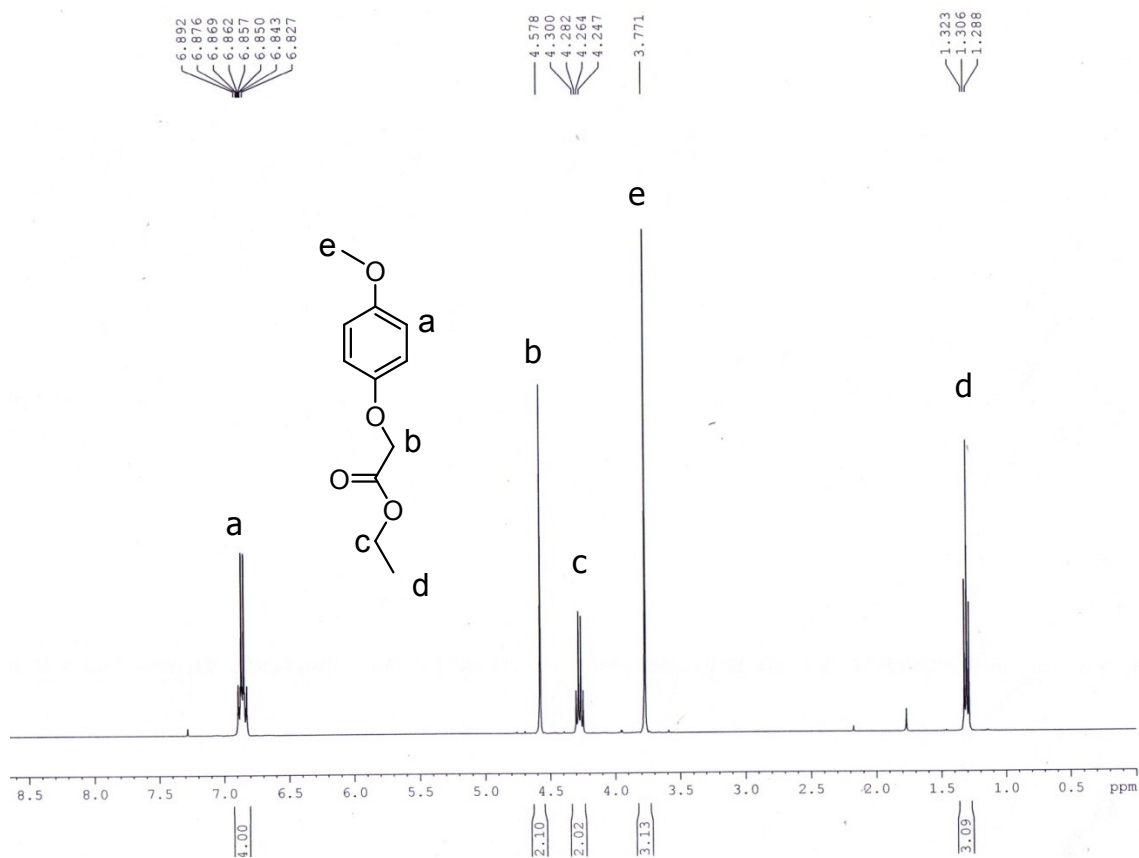

Figure S1. <sup>1</sup>H NMR spectrum of compound 3.

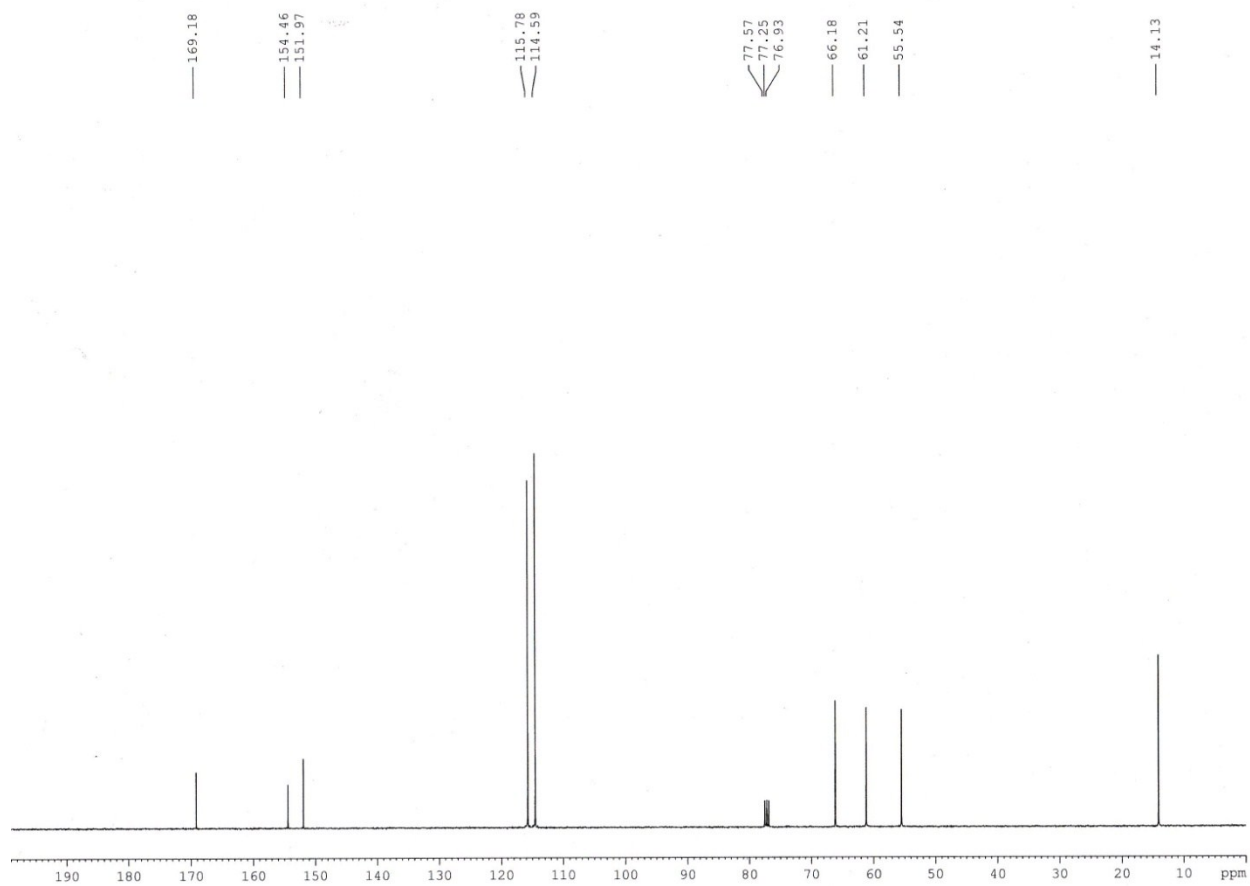

**Figure S2.**  $^{13}\text{C}$  NMR spectrum of compound **3** in  $\text{CDCl}_3$ .

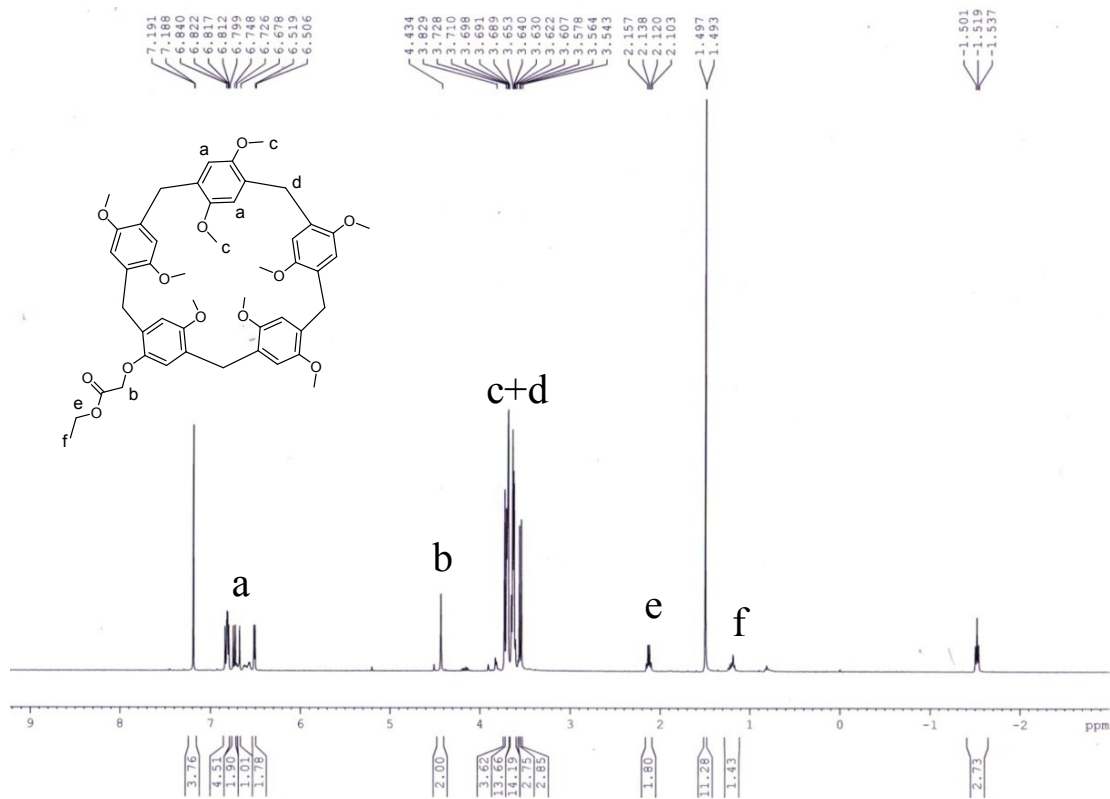

**Figure S3.** <sup>1</sup>H NMR spectrum of compound 4 in CDCl<sub>3</sub>.

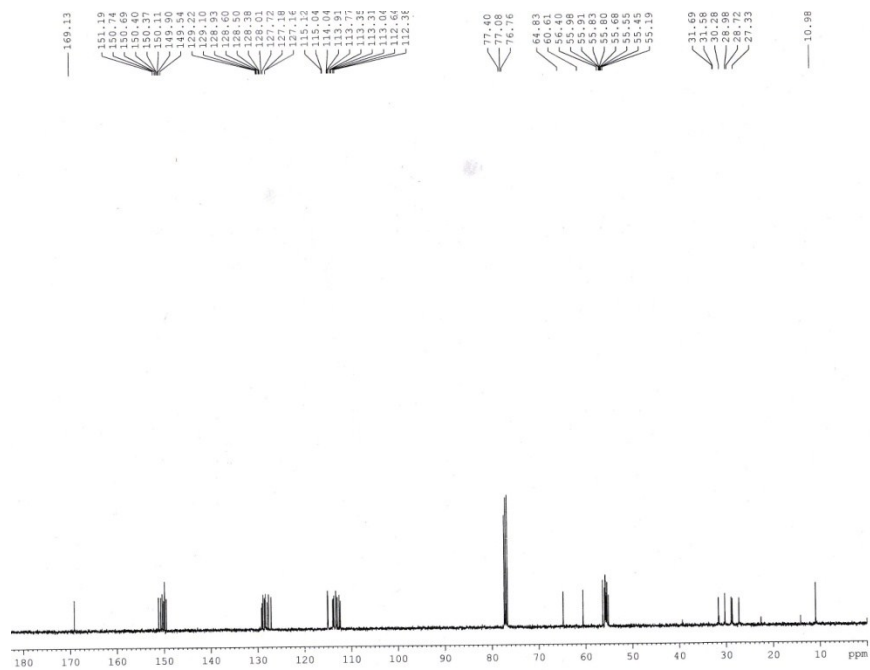

**Figure S4.** <sup>13</sup>C NMR spectrum of compound 4 in CDCl<sub>3</sub>.

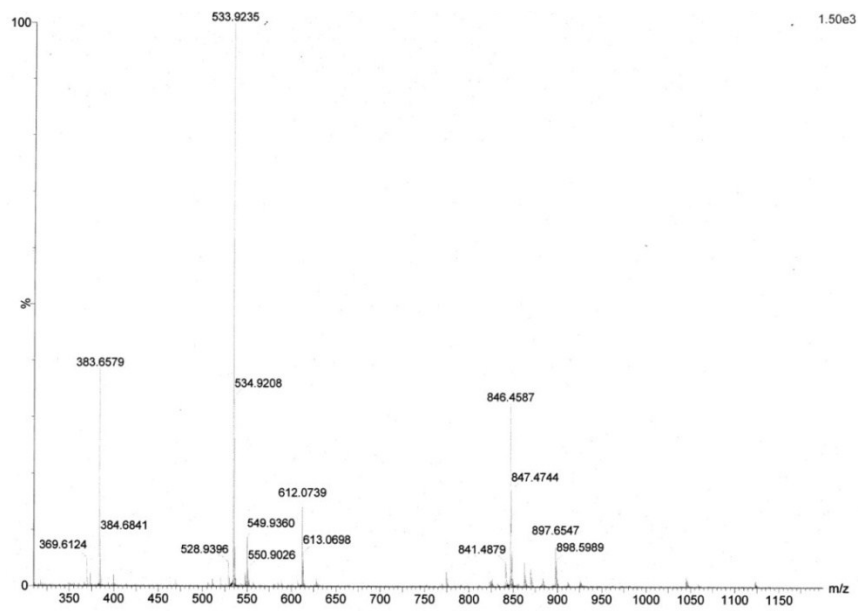

**Figure S5.** Electrospray ionization mass spectrum of compound (ESI MS) **4**. Assignment of the main peak:  $m/z$  846.45  $[M+Na]^+$  (40%).

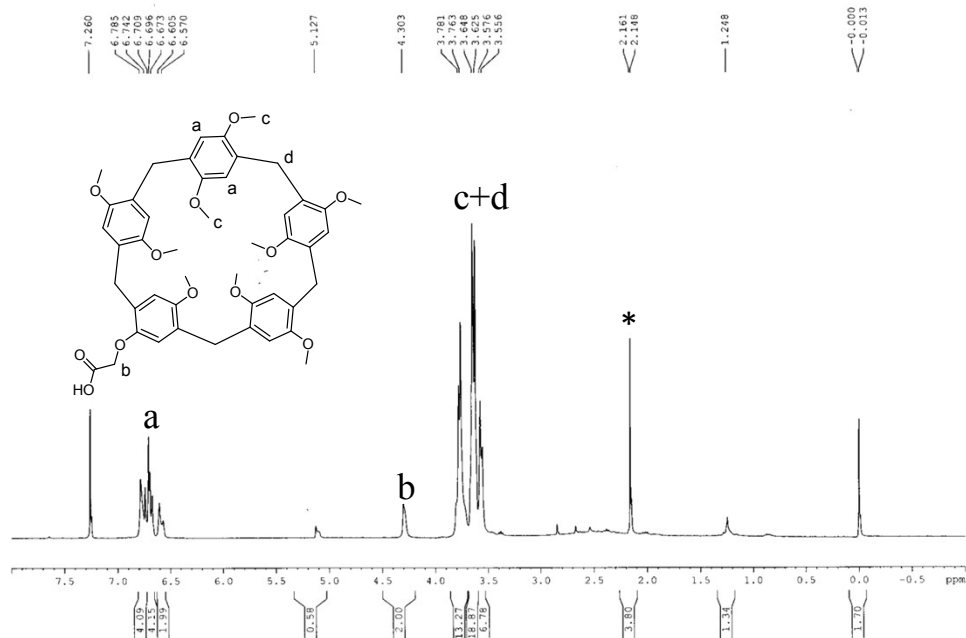

**Figure S6.**  $^1\text{H}$  NMR spectrum of compound **5** in  $\text{CDCl}_3$  (\* Represents the appearance of peak due to  $\text{CH}_3\text{COCH}_3$ ).

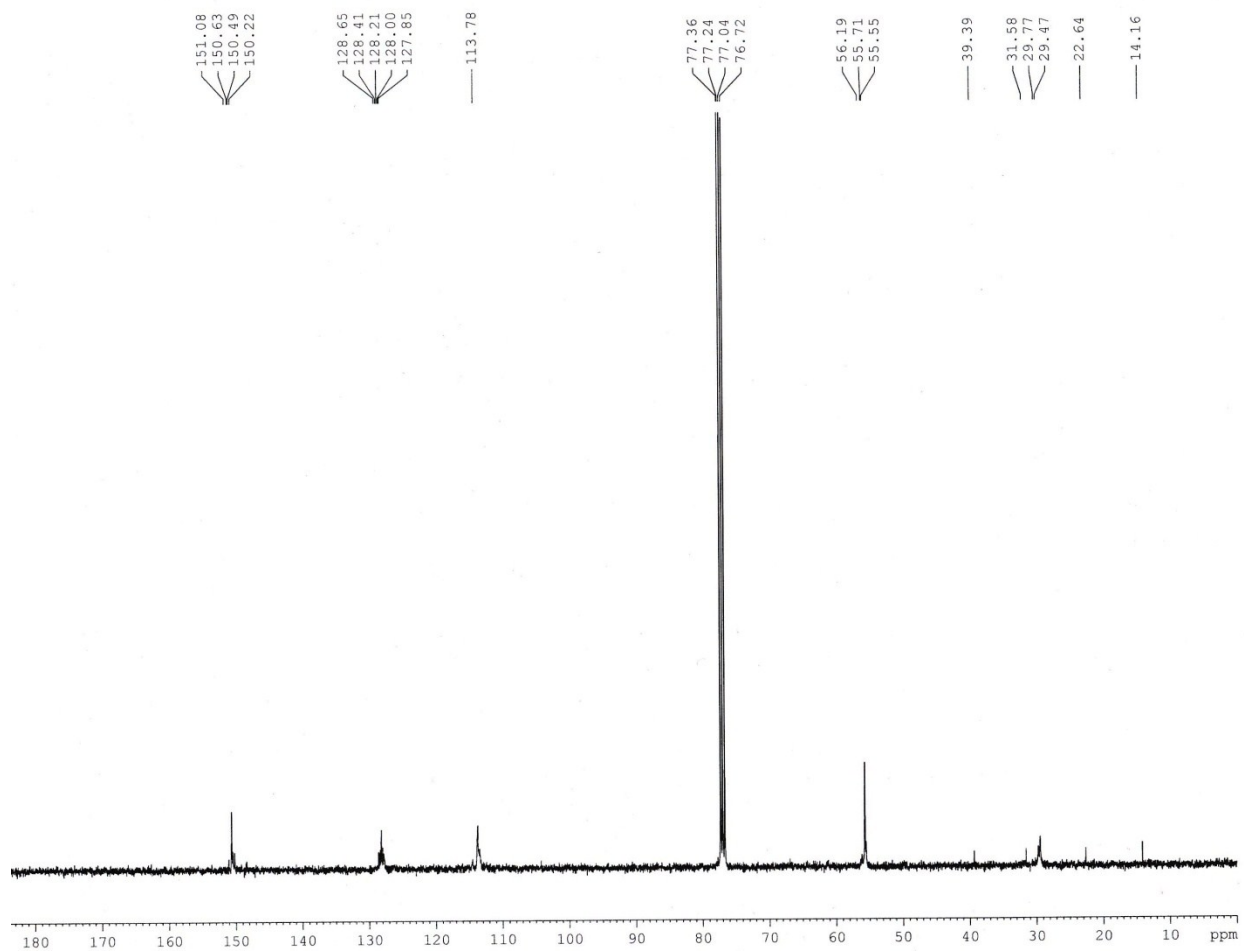

**Figure S7.**  $^{13}\text{C}$  NMR spectrum of compound 5 in  $\text{CDCl}_3$ .

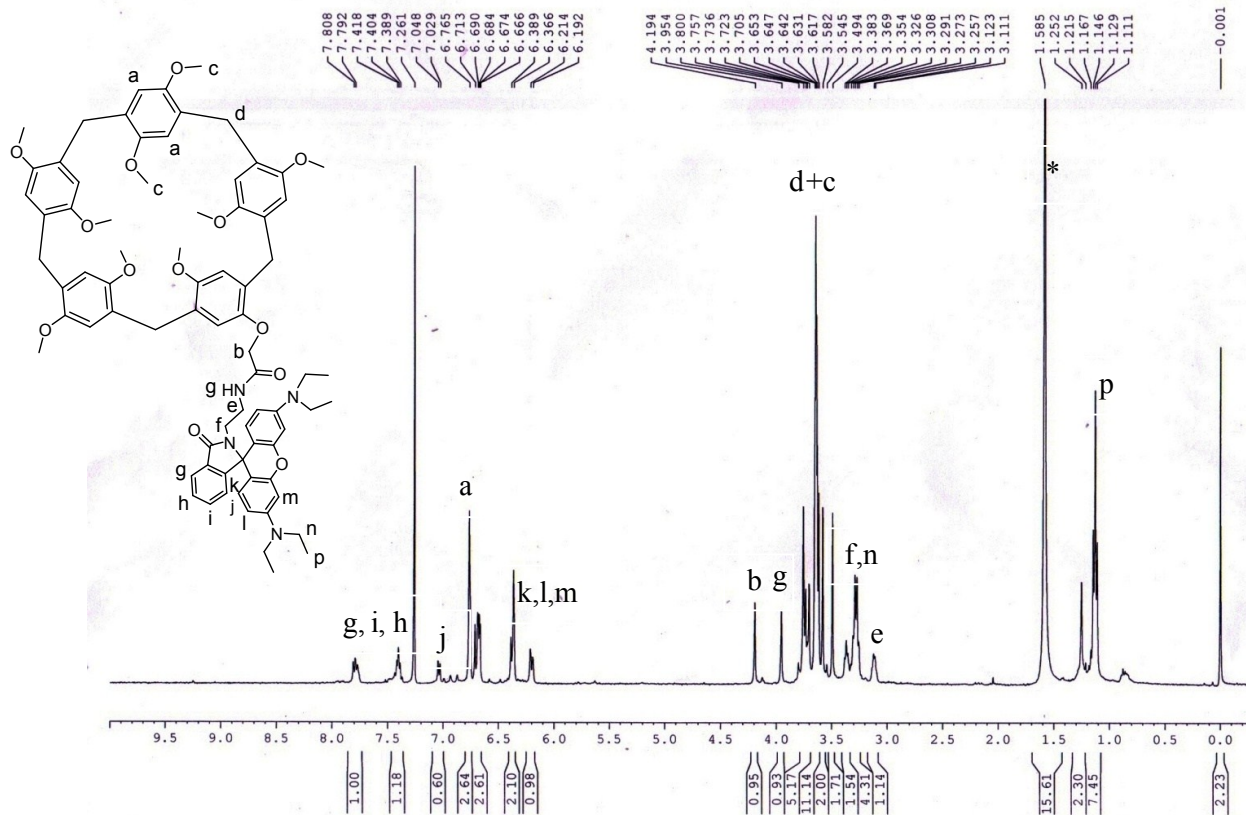

**Figure S8.** <sup>1</sup>H NMR spectrum of receptor **1** in CDCl<sub>3</sub> (\* Represents the appearance of peak due to H<sub>2</sub>O).

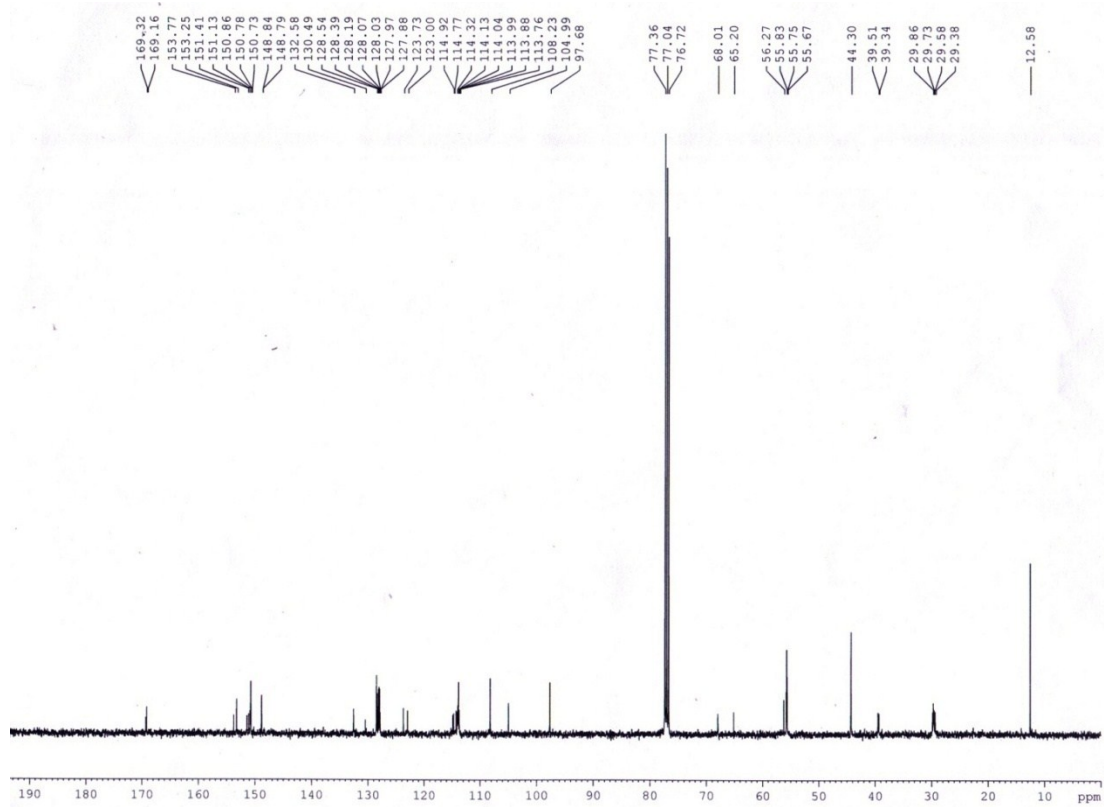

**Figure S9.**  $^{13}\text{C}$  NMR spectrum of receptor **1** in  $\text{CDCl}_3$ .

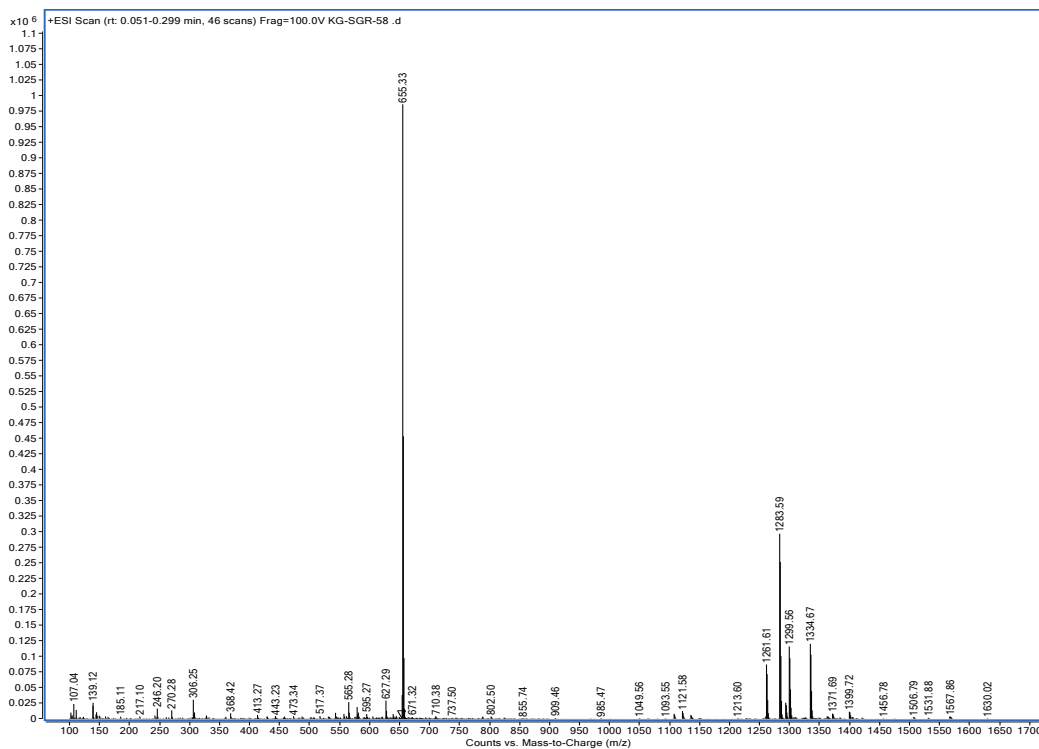

Figure S10. ESI MS of receptor 1. Assignment of the main peak:  $m/z$  1283.59  $[M+ Na]^+$  (30%).

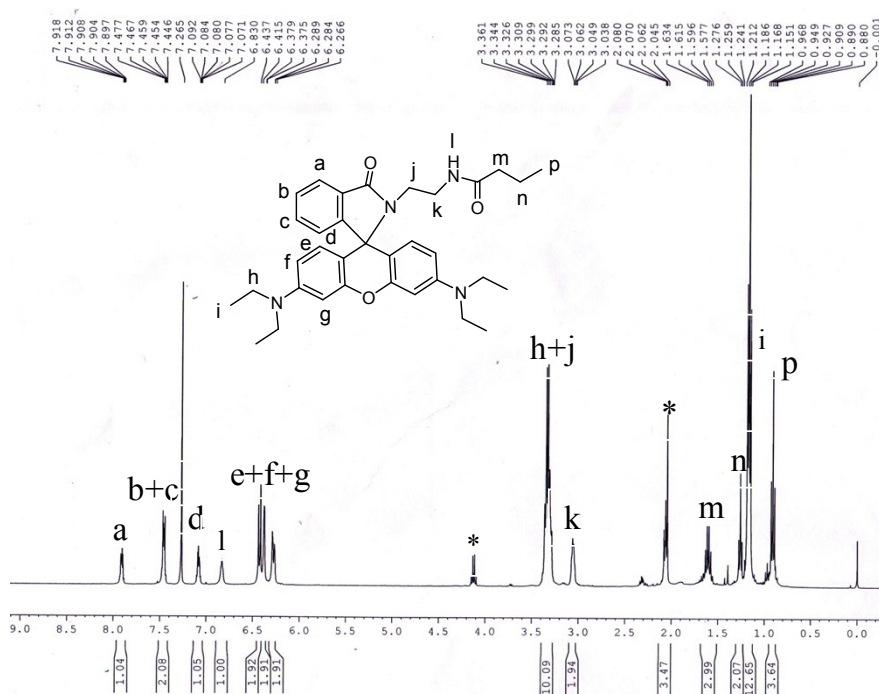

Figure S11. <sup>1</sup>H NMR spectrum of receptor 2 in CDCl<sub>3</sub>.



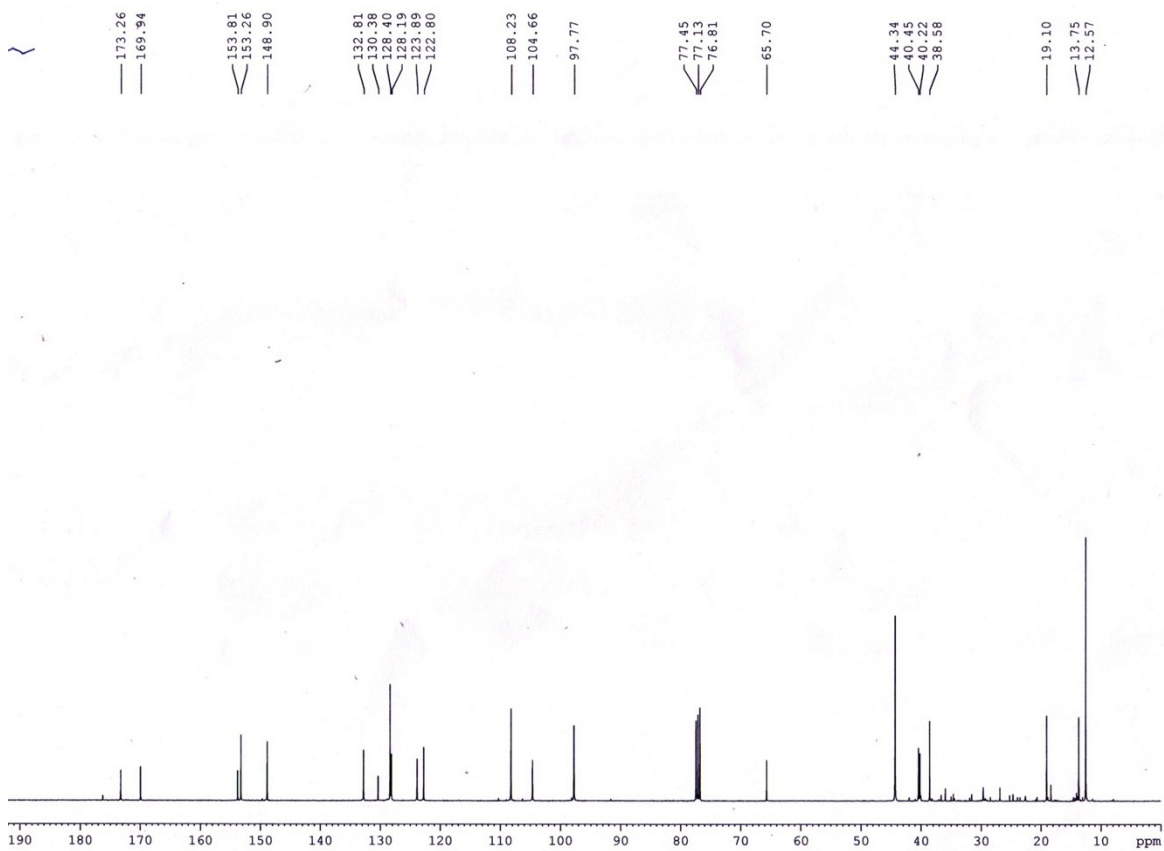

**Figure S12.**  $^{13}\text{C}$  NMR spectrum of compound **2** in  $\text{CDCl}_3$ .

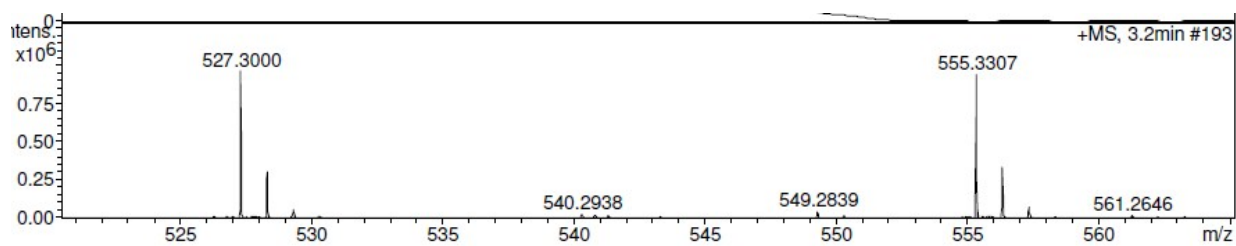

**Figure S13.** ESI-MS spectrum of compound **2**.

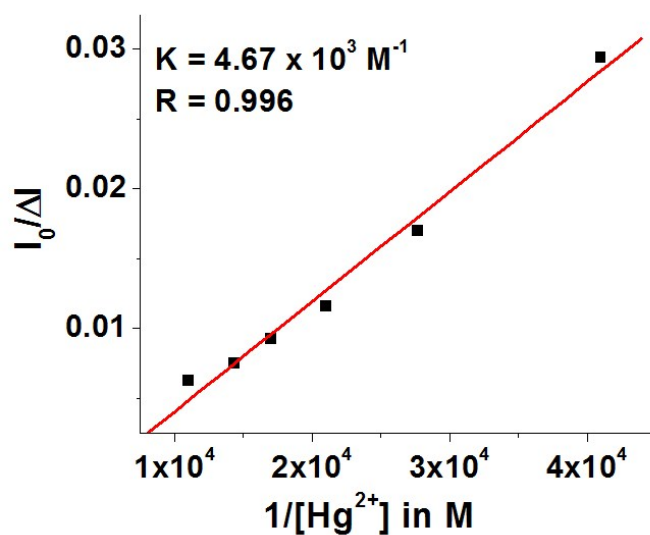

**Figure S14.** UV-Vis Benesi-Hilderband plot for receptor 1 with  $\text{Hg}^{2+}$  ( $[\text{H}] = [\text{G}] = 2.5 \times 10^{-5} \text{ M}$ ).

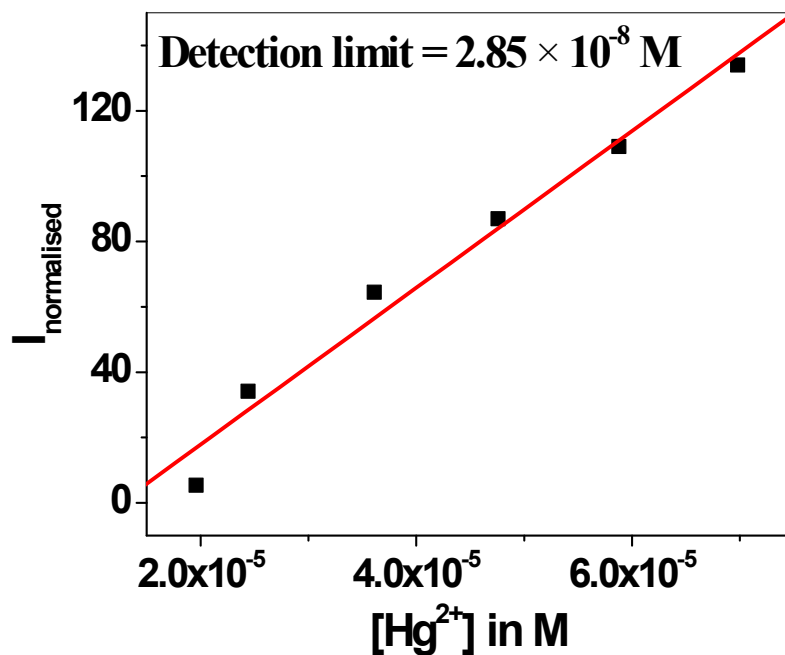

**Figure S15.** Linear binding constant curve for receptor 1 ( $c = 2.5 \times 10^{-5} \text{ M}$ ) with  $\text{Hg}^{2+}$  ( $c = 1 \times 10^{-3} \text{ M}$ ).

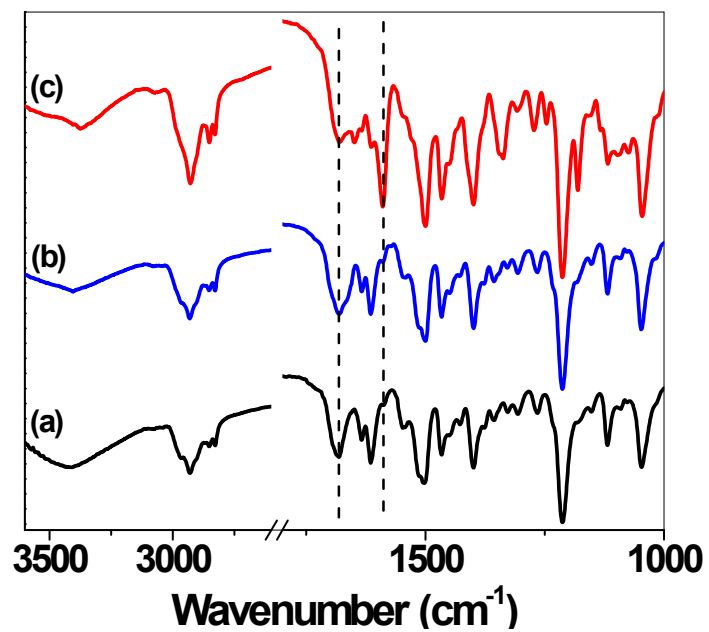

**Figure S16.** Partial IR spectrum of (a) receptor **1**, (b) receptor **1** in presence of equivalent amount of  $\text{Cu}(\text{ClO}_4)_2$  and (c) receptor **1** in presence of equivalent amounts of  $\text{Hg}(\text{ClO}_4)_2$ .

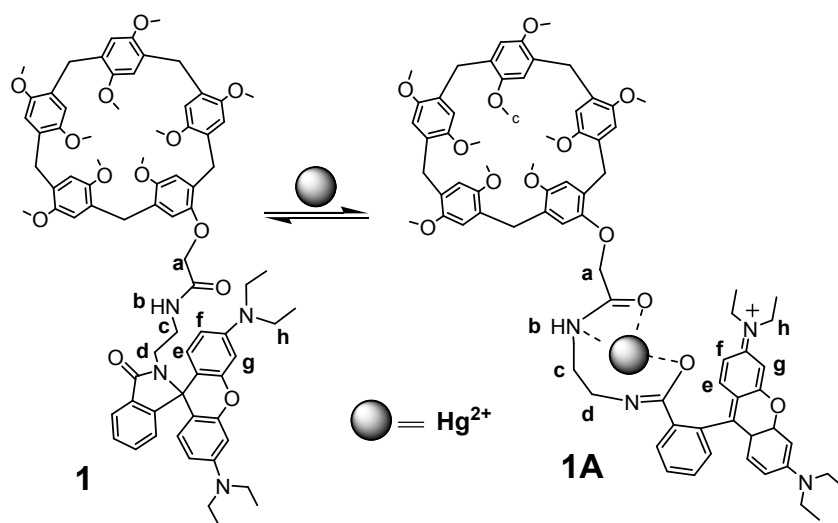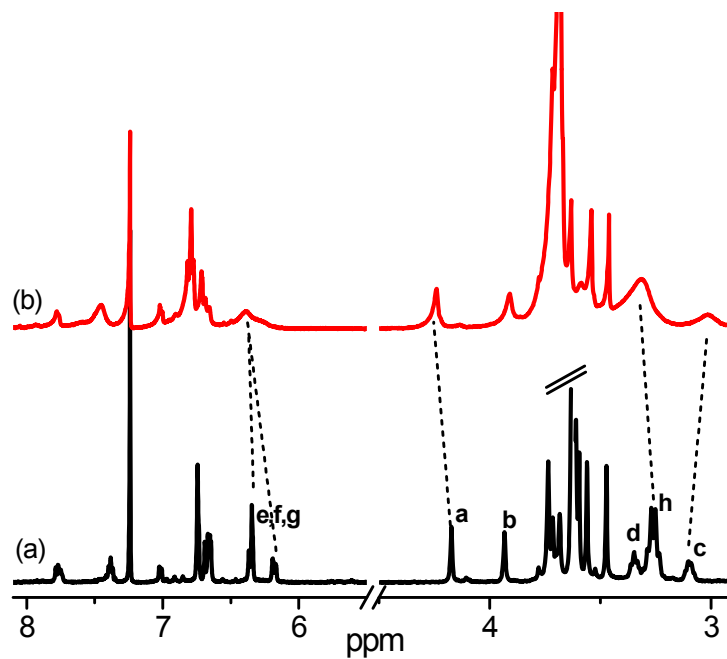

**Figure S17.** (a) Suggest mode of binding of receptor **1** with  $\text{Hg}^{2+}$ , and partial  $^1\text{H}$  NMR spectra of receptor **1** ( $c = 2.5 \times 10^{-3}$  M) (a) in absence and (b) presence of 1 equiv. of  $\text{Hg}^{2+}$  ion in  $\text{CDCl}_3$ .

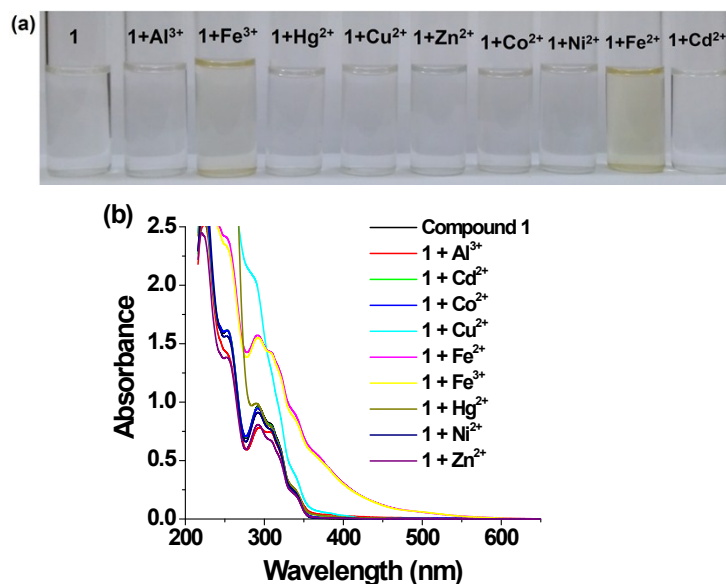

**Figure S18:** Color change of solution of compound **1** ( $c = 2.5 \times 10^{-5}$  M) in  $\text{CH}_3\text{CN-H}_2\text{O}$  (3:1, v/v, 10 mM Tris-HCl Buffer, pH = 6.5) after addition of 50 equiv. amounts of different metal ions (taken as perchlorate salt); (b) Change in absorption spectra of **1** ( $c = 2.5 \times 10^{-5}$  M) upon addition of 50 equiv. amounts of different metal ions in  $\text{CH}_3\text{CN-H}_2\text{O}$  (3:1, v/v, 10 mM Tris-HCl Buffer, pH = 6.5).

**Table S1:** Reported Rhodamine-based structures in  $\text{Hg}^{2+}$  sensing

| Entry | Structure of compounds                                                                                                                                      | Selectivity                               | Medium                                     | Detection limit (M)                                                                 | Ref. |
|-------|-------------------------------------------------------------------------------------------------------------------------------------------------------------|-------------------------------------------|--------------------------------------------|-------------------------------------------------------------------------------------|------|
| 1.    | 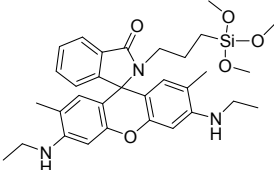                                                                         | $\text{Hg}^{2+}$ ion                      | Water/ethanol (1:4, v/v, PBS buffer, pH 7) | $2.59 \times 10^{-9}$                                                               | 1    |
| 2.    | <br>R = -CH <sub>3</sub> , -OCH <sub>3</sub> , -NO <sub>2</sub><br>1 2 3 | $\text{Hg}^{2+}$ ion                      | DMF-H <sub>2</sub> O (1:1, v/v, pH 7.2)    | (1) $1.46 \times 10^{-8}$<br>(2) $1.69 \times 10^{-8}$<br>(3) $1.64 \times 10^{-7}$ | 2    |
| 3.    |                                                                          | $\text{Hg}^{2+}$ and $\text{Fe}^{3+}$ ion | EtOH/PBS buffer (1:1, v/v, pH 7.4)         | $2.72 \times 10^{-6}$                                                               | 3    |

|     |                                                                                     |                                                                         |                                                                                           |                                                                                                                   |    |
|-----|-------------------------------------------------------------------------------------|-------------------------------------------------------------------------|-------------------------------------------------------------------------------------------|-------------------------------------------------------------------------------------------------------------------|----|
| 4.  | 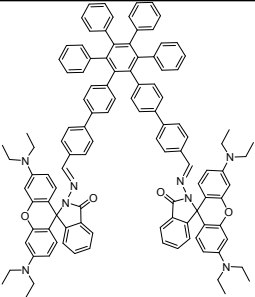   | Hg <sup>2+</sup> ion                                                    | HEPES/CH <sub>3</sub> CN<br>(1:1, pH 7.0)                                                 | 1 × 10 <sup>-7</sup>                                                                                              | 4  |
| 5   |    | Hg <sup>2+</sup> ion                                                    | CH <sub>3</sub> CN/H <sub>2</sub> O<br>(7:3 v/v) in<br>HEPES buffer at<br>pH 7.2          | 1.62 × 10 <sup>-9</sup>                                                                                           | 5  |
| 6.  |    | Hg <sup>2+</sup> ion                                                    | CH <sub>3</sub> CN/H <sub>2</sub> O<br>(1:1, v/v, 10<br>mM, Tris-HCl<br>buffer pH 7.04)   | 2.63 × 10 <sup>-8</sup>                                                                                           | 6  |
| 7.  |    | Hg <sup>2+</sup> ion                                                    | DMF:H <sub>2</sub> O (2:8,<br>v/v).                                                       | 7.48 × 10 <sup>-9</sup>                                                                                           | 7  |
| 8.  |   | Dual<br>detection<br>of Al <sup>3+</sup><br>and Hg <sup>2+</sup><br>ion | CH <sub>3</sub> CN/H <sub>2</sub> O<br>(3:1, v/v; 10<br>mM HEPES<br>buffer ; pH =<br>6.85 | 1.9 × 10 <sup>-7</sup> for<br>Al <sup>3+</sup> ion and<br>1.26 × 10 <sup>-7</sup> ion<br>for Hg <sup>2+</sup> ion | 8  |
| 9.  |  | Hg <sup>2+</sup> ion                                                    | PBS/C <sub>2</sub> H <sub>5</sub> OH<br>(9/1, v/v)                                        | 9.1 × 10 <sup>-9</sup>                                                                                            | 9  |
| 10. |  | Hg <sup>2+</sup> ion                                                    | CH <sub>3</sub> CN:H <sub>2</sub> O<br>(3:7)                                              | 136 × 10 <sup>-7</sup>                                                                                            | 10 |
| 11. |  | Ga <sup>3+</sup> and<br>Hg <sup>2+</sup> ion                            | methanol-HEP<br>ES (1:1, v/v, pH<br>7.0)                                                  | 6.34 × 10 <sup>-9</sup> for<br>Hg <sup>2+</sup> 3.52<br>× 10 <sup>-9</sup> for Ga <sup>3+</sup>                   | 11 |

|     |                                                                                   |                      |                    |                         |              |
|-----|-----------------------------------------------------------------------------------|----------------------|--------------------|-------------------------|--------------|
| 12. | 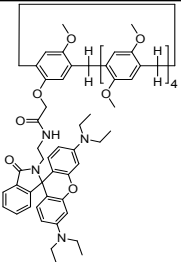 | Hg <sup>2+</sup> ion | CH <sub>3</sub> CN | 2.85 × 10 <sup>-8</sup> | Present work |
|-----|-----------------------------------------------------------------------------------|----------------------|--------------------|-------------------------|--------------|

## References

1. H. Liu, P. Yu, D. Du, C. He, B. Qiu, X. Chen, G. Chen, *Talanta*, 2010, **81**, 433.
2. S. Angupillai, J.-Y. Hwang, J.-Y. Lee, B. A. Rao, Y.-A. Son, *Sensors and Actuators B: Chemical*, 2015, 214, 101.
3. J. Liu, Y. Qian, *Dyes and Pigments*, 2017, **136**, 782.
4. G. Singh, S. I. Reja, V. Bhalla, D. Kaur, P. Kaur, S. Arora, M. Kumar, *Sensors and Actuators B: Chemical*, 2017, **249**, 311.
5. R. Bhowmick, R. Alam, T. Mistri, D. Bhattacharya, P. Karmakar, M. Ali, *ACS Appl. Mater. Interfaces*, 2015, **7**, 7476.
6. A. Sikdar, S. Roy, S. Dasgupta, S. Mukherjee, S. S. Panja, *Sensors and Actuators B: Chemical*, 2018, **263**, 298.
7. K. S. Min, R. Manivannan, Y. A. Son, *Sensors and Actuators B: Chemical*, 2018, **261**, 545.
8. S. Mondal, C. Bandyopadhyay, K. Ghosh, *Supramol. Chem.*, 2019, **31**, 1.
9. Y. Li, S. Qi, C. Xia, Y. Xu, G. Duan, Y. Ge, *Analytica Chimica Acta*, 2019, **1077**, 243.
10. S. K. Patil, D. Das, *Spectrochimica Acta Part A: Molecular and Biomolecular Spectroscopy*, 2019, 210, 44.
11. D. Jiang, X. Xue, M. Zhu, G. Zhang, Y. Wang, C. Feng, Z. Wang, H. Zhao *Ind. Eng. Chem. Res.* 2019, **58**, 18456.
